# Supplementary material
Source: publisher site journal article supplement (https://www.dovepress.com/article/326740)
Supplement: Supplementary file 1 [file get_supplementary_file.php]

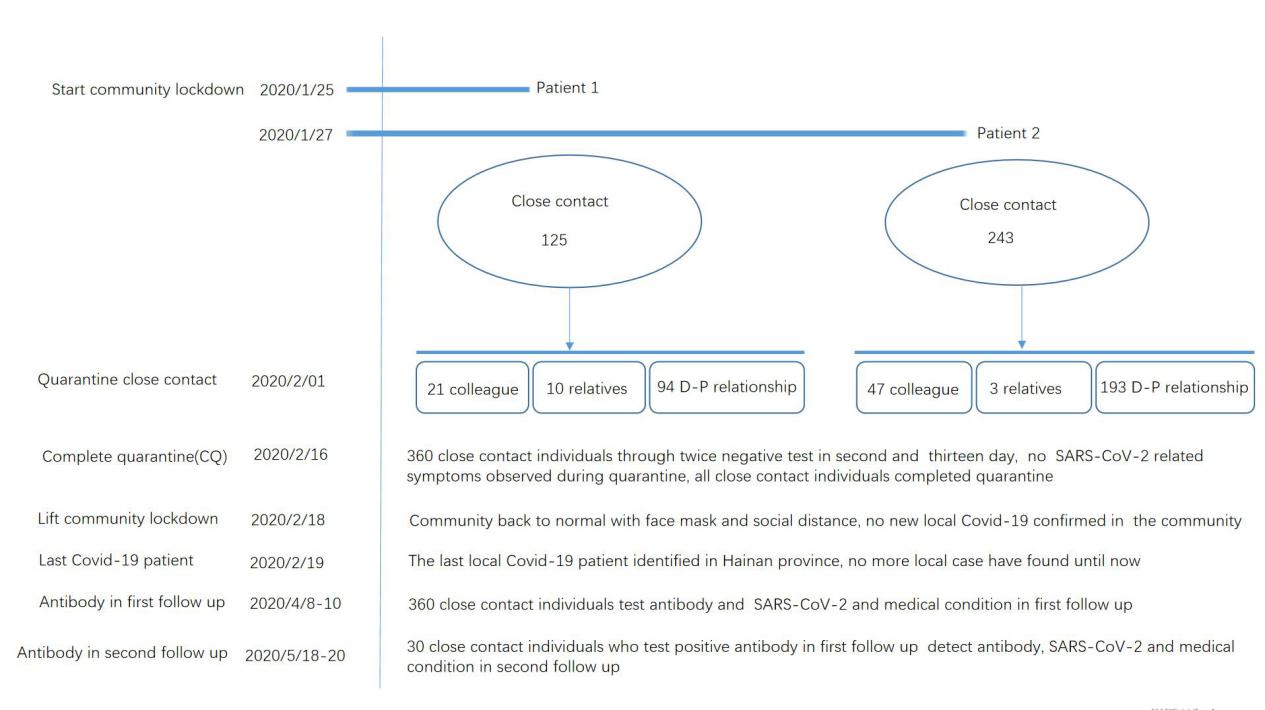


Supplementary Figure 1.Timeline of two Covid-19 infection reported in Qiongzhong community and close contacts follow up. D-P relationship: Doctor-patient relationship
